# Supplementary material for: A model of multiple tumor marker for lymph node metastasis assessment in colorectal cancer: a retrospective study
Source: PeerJ. 2022 Apr 11;10:e13196. doi: 10.7717/peerj.13196 (PMC9009328; doi:10.7717/peerj.13196)
Supplement: Supplemental Information 3 [file peerj-10-13196-s003.xlsx]

## Sheet: Sheet1
Patients_ID	Sex	Age	T	N	M	AFP	CA125	CA153	CA199	CEA
1	0	60	1	0	0	2.99	13.24	12.65	28.8	18.88
2	1	68	2	0	0	1.68	11.93	13.12	16.75	6.98
3	0	55	2	1	0	1.85	4.15	6.88	46.7	3.11
4	0	48	2	1	0	2.1	16.85	8.14	67.86	4.52
5	1	55	2	1	0	2.21	11.74	13.71	26.54	8.02
6	0	83	2	2	0	4.59	8.11	13.01	21.87	4.08
7	0	65	1	1	0	1.87	7.71	6.69	3.98	1.93
8	0	70	2	0	0	2.29	33.79	14.26	18.48	21.44
9	0	67	2	1	0	1.37	18.02	16.32	160.1	35.43
10	0	70	2	1	0	2.11	23.47	21.5	16.33	2.52
11	1	48	1	0	0	4.64	7.15	12.48	6.44	1.4
12	1	66	2	1	0	3.7	10.7	10.08	53.46	13.99
13	0	53	2	0	0	3.94	10.05	19.23	7.34	1.63
14	1	57	1	1	0	2.31	15.14	14.69	76.78	8.53
15	1	78	3	0	0	3.8	30.67	35.47	13.2	5.19
16	1	68	1	0	0	3.99	8.8	20.58	19.18	11.88
17	1	74	1	1	0	2.21	8.74	9.54	18.78	1.6
18	0	67	2	1	0	2.63	16.17	7.72	12.64	13.24
19	0	50	2	0	0	4.57	13.51	27.27	12.08	1.55
20	0	70	2	0	0	3.45	15.5	10.88	12.16	2.77
21	0	68	2	0	0	2.8	14.45	8.02	16.62	6.33
22	0	74	1	0	0	2.17	12.93	12.6	11.23	4.91
23	1	82	2	1	0	3.06	8.05	8.64	19.25	8.65
24	0	76	2	2	0	1.71	15.29	5.36	25.67	2.44
25	1	74	2	2	0	1.88	10.12	6.2	84.98	46.8
26	0	53	2	0	0	3.88	9.85	19.03	10.14	4.69
27	1	81	2	0	0	4.05	9.38	3.86	18.72	4.54
28	0	53	2	2	0	2.07	10.52	10.47	16.4	2.57
29	1	44	3	1	1	13.8	10.53	15.87	1.18	18.58
30	0	45	2	0	0	3.02	17.62	4.89	6.17	1.52
31	0	47	3	0	0	3.1	9.63	4.78	12.12	12.45
32	1	54	1	0	0	2.34	18.64	13.47	8	2.54
33	0	71	3	2	0	3.63	7.36	12.25	12.45	8.95
34	1	46	2	1	0	3.35	14.28	6.25	18.6	1.37
35	1	59	1	0	0	2.72	19.21	20.14	7.38	1.89
36	0	65	3	1	0	2.15	35.63	6.33	16.46	1.73
37	0	43	2	1	0	2.13	17.4	12.46	0.81	7.05
38	1	60	1	0	0	1.72	28.03	43.72	22.26	8.93
39	0	54	1	0	0	3.65	7.95	9.71	8.1	10.44
40	0	66	3	0	0	2.27	8.49	11.87	14.6	1.82
41	0	73	2	2	0	3.17	15.13	6.49	14.81	8.83
42	1	59	2	0	0	4.65	24.18	15.21	21.73	12.53
43	1	65	1	1	0	3.16	22.52	10	18.95	13.56
44	0	68	2	0	0	2.06	7.87	15.95	9.06	7.48
45	0	52	1	0	0	1.55	25.28	20.61	58.4	39.55
46	0	72	2	0	0	1.74	16.24	7.12	11.33	11.27
47	0	53	2	0	0	1.85	9.75	8.02	5	3.14
48	0	44	2	0	0	2.35	14.67	6.79	7.25	2.07
49	0	50	3	0	0	2.62	2.28	8.41	1.02	4.82
50	0	67	1	0	0	2.05	7.93	12.15	0.6	18.98
51	0	68	1	0	0	1.3	24.43	13.53	18.59	3.17
52	1	68	2	2	0	2.39	26.59	11.18	0.6	31.09
53	0	65	2	1	1	1.64	7.36	22.74	30.09	42.49
54	0	67	2	0	0	2.79	5.76	7.68	9.38	2.31
55	0	68	1	0	0	3.85	8.35	12.55	12.07	41.21
56	1	57	3	0	0	4.02	10.6	8.9	46.15	3.51
57	0	71	1	0	0	16.36	10.2	19.46	11.45	3.94
58	0	46	1	0	0	4.05	9.5	7.52	0.6	9.44
59	0	68	2	1	0	2.9	44.79	31.46	20.03	49.77
60	0	52	3	2	0	1.76	5.11	19.41	76.24	2.71
61	1	54	2	0	0	2.02	11.15	10.31	34.39	4.85
62	0	56	2	2	0	1.77	7.76	13.54	11.58	2.88
63	0	79	1	0	0	2.27	23.22	16.7	35.67	6.17
64	1	77	1	0	0	1.7	9.74	10.77	13.65	1.21
65	1	64	2	0	0	1.34	10.76	6.7	14.88	9.36
66	1	73	2	0	0	1.19	6.79	10.49	29.26	3.79
67	1	64	2	1	0	4.97	34.69	9.94	1.78	9.62
68	0	59	2	1	0	6.89	16.94	5.11	6.08	2.99
69	1	70	2	0	0	2	15.53	21.17	8.37	2.43
70	1	66	3	0	0	1.78	11.83	11.45	0.66	1.74
71	1	67	2	0	0	2.76	16.33	23.48	16.4	2.75
72	1	57	2	0	0	2.2	15.89	8.47	0.6	17.47
73	0	76	2	1	0	3.88	10.82	22.44	5.29	2.21
74	0	74	3	0	0	2.74	29.56	16.76	10.64	2.27
75	0	74	2	1	0	2.05	10.7	6.05	0.74	1.72
76	0	51	2	2	0	3.77	10.61	10.27	39.63	6.14
77	0	69	1	0	0	1.98	21.92	16.39	14.51	5.1
78	0	51	2	1	0	3.36	27.66	8.39	37.6	27.78
79	1	73	3	0	0	2.69	2.33	10.46	6.15	1.54
80	0	72	3	0	0	2.4	13.33	19.91	21.1	9.35
81	0	64	2	1	0	2.43	31.93	11.98	34.34	12.56
82	0	60	2	0	0	4.44	8.98	11.51	10.66	7.07
83	0	64	2	1	0	2.36	11.11	12.49	34.76	44.6
84	0	77	3	2	1	1.57	323	15.19	274.7	118.5
85	1	76	2	1	0	1.75	13.42	5.48	0.6	6.62
86	0	31	2	1	0	3.26	15.1	7.81	66.64	5.4
87	0	72	1	1	0	3.62	11.04	10.85	9.5	5.34
88	0	69	2	1	0	2.71	8.27	7.05	36.06	5.13
89	1	70	2	1	0	1.51	8.92	9.44	5.72	1.23
90	0	81	2	0	0	1.38	63.81	6.9	7.03	5.6
91	0	69	2	1	0	3.12	6.96	8.71	42.56	4.26
92	1	64	1	0	0	2.37	10.65	13.17	45.36	3.58
93	0	71	2	1	0	1.82	15.69	10.37	12.13	5.76
94	1	46	2	0	0	2.52	31.12	15.73	40.33	8.31
95	1	58	1	0	0	3.17	8.35	9.37	5.83	1.55
96	0	85	1	0	0	1.49	7.4	12.18	8.48	6.41
97	1	66	2	0	0	2.16	20.71	8.92	49.75	2.1
98	1	73	1	0	0	1.77	6.56	12.55	14.58	7.91
99	0	75	2	1	0	4.82	7.02	14.15	8.01	9.14
100	0	48	3	0	0	2.9	18.95	10.33	125.5	23.24
101	0	53	2	1	0	1.77	6.79	11.21	10.82	5.15
102	1	72	1	0	0	2.8	15.41	19.21	5.47	2.42
103	1	73	2	0	0	1.53	17.3	9.95	0.6	4.75
104	0	52	1	0	0	2.84	11.21	6.48	1.82	4.37
105	0	61	1	1	0	2.64	7.66	7.22	18.76	1.76
106	1	46	2	0	0	2.03	10.86	11.03	5.66	2.38
107	0	59	1	0	0	2.64	22.05	10.64	17.66	7.44
108	0	70	2	1	0	5.33	6.48	20.36	22.57	5.57
109	1	69	2	0	0	22.82	43.3	16.5	77.45	5.59
110	0	68	1	0	0	3.8	7.87	17.82	10.97	8.98
111	0	43	1	0	0	1.91	10.62	7.09	15.13	1.74
112	1	62	2	1	0	1.55	15.97	22.3	4.77	2.72
113	1	78	2	1	0	4.47	15.91	6.39	23.22	5.23
114	1	56	1	0	0	2.33	14.96	11.43	4.03	3.1
115	0	80	2	0	0	2.89	18.2	7.38	18.67	1.64
116	1	48	2	1	0	0.96	13.42	14.7	11.72	2.74
117	1	50	2	0	0	1.79	13.15	7.9	10.21	3.15
118	0	66	2	0	0	2.95	18	11.4	8.37	12.48
119	0	65	2	0	0	2.05	7.12	21.66	8.49	0.78
120	0	69	2	2	1	3.63	20.59	8.63	130.1	38.72
121	1	46	2	0	0	1.54	36.81	17.11	13.02	5.96
122	0	63	2	2	1	2.13	24.91	23.47	1000	802.1
123	1	68	1	1	0	2.3	7.27	19.72	11.73	4.47
124	1	65	3	0	0	1.68	12.25	11.48	7.89	1.46
125	0	42	2	2	0	1.95	32.56	6.05	1.24	6.25
126	1	51	2	0	0	2.42	12.12	17.46	8.62	2.8
127	1	63	2	1	1	1.63	17.09	7.26	12.88	2.77
128	0	55	2	2	1	6.82	43.83	8.16	123.9	65.05
129	0	65	2	0	0	1.47	12.05	28.76	15.24	1.76
130	0	63	2	0	0	4.04	8.44	7.04	13.13	7.65
131	0	67	2	1	0	4.3	9.01	14.71	73.66	10.48
132	1	67	2	1	0	3.29	21.48	8.43	14.91	1.84
133	0	66	3	0	0	3.69	9.14	9.14	6.81	5.35
134	0	47	3	2	0	1.34	3.16	8.12	64.46	6.64
135	0	49	1	0	0	2.32	11.94	8.15	7	5.02
136	1	28	2	2	0	2.62	12.74	5.94	34.5	26.55
137	0	63	3	2	0	1.81	36.14	12.91	7.92	5.25
138	1	54	2	1	1	3.35	23.95	11.16	18.51	3.74
139	1	61	1	0	0	2.04	17.68	24.49	5.97	2.34
140	0	53	2	0	0	3.36	12.03	8.28	8.55	4.85
141	0	53	3	1	0	2.65	7.75	5.22	5.67	2.08
142	1	47	2	2	0	2.4	5.78	30.24	6.88	199.3
143	0	61	2	1	0	2.31	23.36	17.73	17.56	9.63
144	0	63	1	0	0	2.89	16.12	7.68	14.27	12.62
145	0	50	1	2	0	1.9	13.69	4.97	11.71	1.7
146	1	76	2	0	0	3.4	20.06	9.27	20.02	9.17
147	0	53	1	0	0	2.15	4.9	7.7	8.98	7.78
148	0	69	1	0	0	2.25	10.77	9.89	8.91	39
149	1	59	1	0	0	2.56	18.47	15.23	8.28	4.19
150	0	73	3	1	0	0.61	163.3	10.16	7.79	4.98
151	1	47	2	0	0	3.1	9.52	11.52	42.49	4.8
152	0	43	2	0	0	5.11	6.32	5.09	7.03	1.21
153	1	69	2	2	0	2.86	5.94	5.58	24.38	22.12
154	0	73	1	0	0	2.83	5.24	7.86	7.59	4.31
155	0	50	3	2	1	5.79	168.1	7.42	1.49	12.88
156	1	55	2	0	0	2.49	17.05	7.81	12.89	2.75
157	1	59	2	1	0	1.08	18.56	20.15	5.99	5.69
158	1	67	1	0	0	2.32	9.98	9.53	25.81	6.91
159	1	48	2	0	0	2.28	20.66	18	12.07	2.82
160	1	72	2	1	0	2.7	6.13	5.94	10.9	6.45
161	0	61	3	1	0	1.75	12.07	18.48	28.29	2.78
162	1	75	1	1	0	1.59	6.53	10.88	20.68	5.38
163	1	63	2	0	0	3.43	6.42	11.07	20.16	4.17
164	0	60	1	0	0	2.17	8.11	21.53	7.88	6.97
165	1	79	2	0	0	3.7	133.3	13.69	16.68	6.42
166	0	69	1	0	0	1.71	26.27	12.05	9.61	4.56
167	0	52	2	1	0	1.54	11.7	7.69	48.71	3.72
168	0	76	2	0	0	5.95	68	9.79	11	6.47
169	0	59	1	0	0	2.62	10.75	10.19	11.96	6.61
170	1	64	1	0	0	1.75	6.93	24.57	8.65	0.7
171	0	76	1	0	0	1.41	31.79	8.35	32.76	9.01
172	0	60	1	0	0	3.63	10.35	15.67	17.98	20.28
173	0	66	1	0	0	7.03	7.53	5.68	10.61	2.34
174	0	49	1	0	0	3.3	14.88	20.66	6.48	1.24
175	0	58	2	1	0	3.57	11.89	4.42	15.64	18.57
176	0	33	2	1	0	2.22	7.17	11.79	10.37	2.15
177	1	66	3	1	0	3.07	26.24	11.04	8.93	2.22
178	1	71	2	2	0	2.13	11.63	12.36	18.82	4.95
179	1	76	2	1	0	3.53	10.5	6.47	4.97	3.39
180	0	73	2	0	0	4.43	11.96	4.93	6.39	1.16
181	0	64	1	0	0	3.01	31.38	21.04	9.12	7.34
182	0	75	3	0	1	2.29	32.9	10.98	37.62	6.61
183	1	69	2	1	0	1.16	10.23	12.84	20.89	13.83
184	0	63	2	1	0	2.37	21.37	6.29	32.25	11.41
185	0	66	2	0	0	3.84	10.18	26.42	21.9	4.49
186	1	66	2	0	0	1.8	21.67	10.46	6.26	2.04
187	0	79	2	1	0	2	20	22.07	25.08	12.97
188	0	46	2	2	0	5.93	64.96	5.47	19.08	3.78
189	0	71	1	0	0	3.7	25.46	11.46	15.54	24.26
190	1	49	1	0	0	3.11	17.74	23.26	11.35	5.7
191	1	71	1	0	0	11.66	74.13	8.87	9.77	2.37
192	0	69	1	0	0	8.93	9.59	22.97	18.8	2.38
193	1	44	1	2	0	3.26	5.02	5.6	14.71	4
194	0	67	1	0	0	22.89	10.35	8.58	9.79	1.63
195	0	69	2	0	0	2.06	3.76	6.82	21.83	5.28
196	0	61	1	1	0	4.71	10.02	6.18	6.61	5.82
197	0	46	1	0	0	3.86	17.17	8.81	5.19	1.44
198	0	67	2	2	0	1.39	19.81	17.14	6.56	11.7
199	0	52	2	1	0	3.31	8.77	6.31	23.96	11.77
200	0	66	2	1	0	1.78	10.34	8.41	89.57	9.75
201	1	61	1	2	1	2.47	23.09	10.8	15.58	50.75
202	0	49	2	1	0	3.13	15.32	12.18	0.79	90.17
203	0	47	2	0	0	2.64	8.91	15.95	21.06	7.1
204	0	79	2	0	0	2.17	15.78	7.11	1.07	6.48
205	0	45	2	2	0	1.61	16.57	19.91	0.91	2.98
206	1	42	3	1	0	454	40.02	11.85	211.6	43.52
207	0	67	2	0	0	3.84	17.05	11.57	8.48	1.12
208	0	61	1	0	0	2.04	22.61	8.35	5.26	2.75
209	1	62	1	0	0	2.36	9.57	10.5	0.61	1.79
210	0	53	2	1	0	2.32	5.27	10.72	13.93	3.07
211	1	60	2	1	0	1.8	10.68	9.75	11.37	4.04
212	1	34	2	0	0	3.26	8.5	6.92	16.5	1.88
213	0	67	2	0	0	3.62	12.46	14.4	0.6	2.74
214	0	60	2	1	0	2.73	12.61	7.13	57.76	5.48
215	0	53	2	0	0	2.66	11.25	17.92	10.95	1.43
216	0	68	2	0	0	3.05	6.18	6.29	13.59	1.66
217	0	68	3	1	0	4.62	12.34	10.61	37.13	6.12
218	0	68	1	0	0	3.38	18.39	12.11	11.25	3.95
219	1	54	1	1	0	2	10.43	24.07	16.26	0.99
220	0	38	1	0	0	3.67	16.64	16.03	10.08	4.17
221	0	59	2	1	0	3.56	27.38	12.97	20.95	10.51
222	0	50	2	2	0	3.66	8.73	6.04	13.55	4.72
223	0	47	2	0	0	3.8	17.25	16.28	0.6	3.31
224	1	66	1	0	0	2.65	11.56	11.85	17.97	2.92
225	1	69	2	2	0	2.84	17.53	6.62	0.6	20.46
226	0	57	1	0	0	4.02	7.28	14.4	7.91	19.53
227	0	64	3	1	0	2.18	12.89	7.75	2.61	1.06
228	0	43	3	0	0	3.16	17.27	14.41	2.52	2.28
229	0	66	2	2	0	5.04	7.86	12.45	12.99	5.13
230	1	63	3	0	0	3.9	7.58	22.61	24.63	2.31
231	0	77	2	1	0	2.59	13.92	14.72	22.53	3.76
232	1	67	2	0	0	3.7	17.88	20.32	19.07	7.19
233	0	78	2	1	0	2.52	22.74	8.44	58.13	39.61
234	0	59	2	0	0	2.89	14.66	9.5	3.89	1.83
235	1	73	1	0	0	3.49	12.93	18.29	10.34	3.27
236	0	67	2	0	0	4.47	106.3	11.2	104.6	17.85
237	0	44	1	0	0	2.7	13.91	11.93	13.16	7.23
238	0	39	1	1	0	2.33	22.39	5.38	29.29	6.78
239	0	54	2	1	0	3.04	11.23	12.49	6.63	2.39
240	1	57	1	1	0	4.43	14.53	10.69	4.99	3.39
241	0	65	2	1	0	5.76	7.12	6.34	7.96	5.42
242	0	63	1	0	0	2.68	16.75	19.91	9.64	1.59
243	0	78	3	2	0	5.44	123.5	6.15	108.1	19.62
244	0	61	1	0	0	2.3	10.91	9.84	13.23	4.48
245	0	70	2	0	0	3.06	10.54	11.44	5.19	2.01
246	0	65	2	1	0	2.32	8.6	5.59	21.99	6.23
247	0	44	1	0	0	2.49	15.66	6.78	7.08	1.13
248	1	60	1	0	0	6.34	20.04	11.98	30.75	3.99
249	0	67	3	2	0	2.8	32.18	9.3	16.57	5.79
250	1	66	1	2	0	6.07	18.39	7.8	10.29	0.4
251	0	58	1	0	0	2.91	8.82	15.09	6.86	2.15
252	0	73	3	2	0	1.67	8.71	13.7	307.6	57.74
253	1	53	2	0	0	2.89	21.7	20.1	149.7	6.69
254	0	64	2	1	1	1.38	14.24	20.55	1000	39.52
255	0	68	2	1	0	2.94	8.17	12.81	5.4	1.42
256	0	88	2	0	0	4.56	17.94	16.06	28.78	10.11
257	0	80	2	0	0	5.58	13.36	17.46	8.09	3.47
258	1	69	1	0	0	4.5	24.17	14.41	0.8	6.99
259	0	79	2	0	0	3.52	36.36	26.5	1.04	10.8
260	0	83	2	0	0	3.3	64.2	21.98	22.11	5.98
261	0	78	2	2	0	2.52	22.83	12.87	18.66	10.78
262	1	51	3	0	0	1.42	21.22	19.99	12.37	4.73
263	0	68	3	0	0	1.51	31.75	7.93	23.52	46.58
264	0	70	2	1	0	1.71	19.07	19.43	24.65	28.78
265	0	44	2	1	0	1.88	9.3	9.33	5.07	1.51
266	0	67	2	1	1	2.12	12.74	16.03	55.41	3.03
267	1	46	2	0	0	12.16	32.87	8.99	11.07	27.67
268	0	77	1	1	0	5.66	18.27	12.15	32.3	3.87
269	1	69	1	0	0	4.41	11.47	5.46	22.75	2.48
270	1	61	2	0	0	1.32	53.33	13.9	64.5	5.3
271	1	73	2	0	0	1.64	6.89	13.59	5.71	13.7
272	0	45	3	0	0	2.01	30.48	7.69	5.65	3.12
273	1	41	1	0	0	4.06	36.81	9.7	11.4	4.89
274	1	75	2	0	0	2.34	20.11	15.89	25.82	4.24
275	0	49	2	0	0	2.46	12.76	10.3	7.56	0.95
276	0	82	2	0	0	1.09	25.26	15.89	9.99	1.63
277	0	69	2	0	0	4.01	30	7.52	10.69	1.55
278	0	75	2	0	0	2.18	39.32	19.65	11.95	3.18
279	0	64	2	0	0	1.55	100.1	10.5	7.84	14.17
280	1	52	3	0	0	1.23	7.52	9.83	2.26	1.12
281	0	78	3	1	0	1.94	9.93	7.49	106	2.36
282	1	46	2	1	0	1.85	72.27	5.65	24.27	3.19
283	0	39	2	1	1	5.77	9.74	8.46	213.2	0.91
284	0	64	2	0	0	1.31	6.2	9.06	0.6	1.67
285	1	58	1	0	0	2.04	14.15	8.22	15.76	2.26
286	0	65	2	0	0	2.56	9.49	6.72	5.65	3.48
287	1	69	1	1	0	1.93	7.94	20.26	13.58	10.33
288	0	64	2	1	0	4.18	11.44	24.92	88.94	2.95
289	0	77	1	0	0	4.37	21.58	9.19	10.73	1.18
290	1	70	3	0	0	3.22	37.48	15.22	89.39	42.91
291	1	62	2	2	0	1.44	11.22	6.5	521.1	4.88
292	1	73	2	0	0	1.78	93.68	18.91	9.85	5.21
293	0	35	2	1	0	3.66	15.01	5.94	1.99	9.27
294	1	64	2	2	0	5.34	37.08	14.34	8.63	1.07
295	1	67	2	1	1	2.1	19.98	21.37	141.9	4.76
296	1	80	2	2	0	3.01	52.9	18.15	40.52	11.48
297	0	68	1	0	0	2.84	11.85	13.92	1.87	1.93
298	0	70	3	2	0	2.84	12.97	18.32	97.34	3.2
299	0	47	1	0	0	1.89	16.93	10.13	18.18	4.33
300	0	86	1	0	0	2.62	11.9	10.11	16.42	4.29
301	1	53	2	1	0	2.68	8.29	14.06	11.05	33.66
302	1	63	1	0	0	2.7	6.62	12.81	7.54	0.2
303	1	72	3	1	0	2.45	18.78	15.03	24.05	66.55
304	1	71	2	1	0	1.94	7.25	19.34	81.86	3.73
305	0	66	2	1	0	2.99	16.13	9.2	6.29	2.84
306	0	59	2	0	0	1.79	23.75	12.87	17.37	1.52
307	1	51	1	0	0	2.38	6.21	9.88	17.7	0.89
308	0	49	2	1	0	2.14	13.42	7.84	11.67	7.83
309	1	50	1	0	0	1.41	8.89	7.5	9.67	1.97
310	0	68	2	1	0	7.87	22.93	14.81	44.66	95.62
311	1	54	2	1	0	1.1	6.54	10.77	9.64	1.64
312	0	61	2	0	0	3.55	11.21	17.85	12.28	5.78
313	0	54	2	0	0	4.89	29.51	14.53	27.52	3.43
314	0	65	3	1	0	1.81	5.49	10.97	13.51	2.35
315	0	68	1	0	0	2.62	4.79	8.54	62.13	14.14
316	0	64	1	1	0	1.35	10.61	8.66	17.45	2.59
317	1	63	2	0	0	1.97	9.51	7.78	0.6	3.1
318	0	53	2	1	0	420.5	8.15	15.45	27.18	12.57
319	1	45	2	2	0	2.72	47.48	19.41	5.9	7.77
320	1	65	2	2	0	2.19	6.32	10.96	4.86	0.55
321	0	67	1	0	0	2.18	20.32	30.6	7.73	1.66
322	0	50	2	1	0	2.66	9.39	10.85	29.92	30.82
323	1	65	2	2	0	1.94	11.93	5.48	180.1	13.49
324	1	63	2	0	0	1.74	12.62	11.55	16.08	2.21
325	0	62	3	2	0	5.31	14.83	7.15	140	68.33
326	0	62	1	1	0	2.49	3.88	12.26	3.81	2.62
327	1	67	1	0	0	1.4	8.02	8.43	5.54	3.9
328	0	51	2	0	0	3.67	15.25	9.06	14.34	2.91
329	0	44	1	1	0	1.97	15.11	6.73	5.23	15.83
330	0	66	1	0	0	3.01	19.21	26.63	5.7	2.69
331	1	20	3	0	0	0.61	9.97	9.82	7.28	1.04
332	0	77	2	1	0	1.5	28.26	14.76	30.51	23.9
333	0	71	2	0	0	2.81	37.42	27.6	17.92	5.42
334	1	65	2	1	0	2.79	10.93	5.7	15.32	2.38
335	0	43	2	2	0	2.11	7.92	3.21	52.29	6.08
336	0	59	3	1	0	6.88	5.56	12.36	341.9	26.84
337	0	70	2	0	0	3.94	30.56	16.65	0.6	12.32
338	1	61	2	2	0	2.61	8.35	4.24	18.96	2.27
339	1	62	1	0	0	4.27	4.49	23.87	10.89	2.44
340	1	28	2	1	0	2.11	21.8	7.43	18.49	3.56
341	0	48	2	2	0	3.44	7.28	6.59	7.97	1.08
342	1	70	2	0	0	3.32	7.87	13.64	18.39	3.06
343	0	61	3	0	0	1.99	18.69	7.15	7.94	3.66
344	0	58	1	0	0	2.44	5.67	13.83	10.57	3.37
345	0	68	1	0	0	4.27	13.55	10.94	6.49	2.36
346	0	43	2	1	0	1.83	10.91	15.39	4.29	15.7
347	1	48	2	0	0	1.63	11.27	8.69	9.45	1.43
348	1	45	2	2	0	0.97	20.48	10.02	8.97	0.39
349	0	60	3	0	0	2.93	15.15	6.25	19.38	7.58
350	1	71	1	0	0	1.61	23.28	10.79	39.32	3.65
351	0	89	2	0	0	3.85	43.03	10.27	34.48	11.6
352	1	42	1	0	0	2.51	12.41	19.66	6.79	1.58
353	0	83	1	0	0	2	5.63	6.87	19.33	15.2
354	0	68	2	1	0	2.73	9.65	19.36	11.43	71.07
355	0	65	1	0	0	3.67	58.71	12.65	70.47	10.76
356	1	73	1	0	0	0.78	11.73	11.74	16.61	5.07
357	0	63	2	0	0	7.68	21.24	1.25	14.18	2.76
358	1	58	2	0	0	2.2	7.05	17.1	11.57	1.78
359	1	62	2	0	0	1.11	18.05	15.92	0.6	1.3
360	0	66	1	0	0	1.7	17.93	6.74	0.6	12.4
361	1	62	1	0	0	1.39	10.9	6.06	33.48	13.74
362	0	69	3	0	0	2.24	7.36	12.49	4.97	2.38
363	1	45	2	0	0	1.34	8.85	3.71	10	48.76
364	0	60	2	1	0	0.63	7.61	17.52	78.75	11.77
365	0	68	2	1	0	4.48	12.44	19.83	7.85	3.25
366	0	58	1	1	1	3.13	14.22	13.06	16.46	141.1
367	0	66	1	0	0	2.36	5.8	7.03	0.82	2.48
368	0	50	2	1	0	2.2	12.55	9.68	7.01	12.63
369	0	63	2	0	0	4.49	8.5	5.98	17.1	9.38
370	1	77	2	1	0	1.28	6.86	12.09	8.46	3.95
371	0	73	3	0	0	3.53	15.73	15.73	0.6	13.74
372	0	70	1	0	0	4.37	13.07	11.99	6.94	4.95
373	0	41	3	0	0	1.9	5.92	9.13	3.12	0.59
374	0	50	2	2	0	2.24	25.45	11.55	7.85	1.52
375	1	73	2	0	0	2.6	11.54	7.76	5.68	1.04
376	1	42	2	0	0	2.26	37.25	10.06	6.37	3.37
377	0	64	2	2	0	4.7	20.27	27.07	191.7	18.57
378	0	62	2	0	0	2.88	8.77	10.76	12.92	2.12
379	1	63	2	1	0	1.94	12.77	14.29	35.87	20.52
380	1	52	3	1	0	3.33	177.3	90.09	0.6	127.7
381	0	57	2	0	0	4.01	10.07	8.85	12.46	4.13
382	0	75	2	1	0	1.94	21.84	9.37	243.9	10.89
383	0	65	1	0	0	1.99	6.69	16.56	9.74	1.19
384	0	53	3	1	0	1.58	19.48	25.97	939.2	83.52
385	1	46	3	0	0	3.48	19.3	8.73	6.7	0.89
386	0	55	2	1	0	1.83	14.46	12.32	88.35	4.79
387	0	84	2	1	0	1.39	14.92	23.92	12.04	3.14
388	0	73	1	0	0	4.08	13.88	12.08	6.74	3.48
389	0	68	3	0	0	2.7	15	6.92	11.97	2.04
390	1	71	2	0	0	2.28	16.56	27.71	73.6	74.13
391	1	73	2	1	0	1.88	8.6	13.08	1.59	2.75
392	0	66	1	0	0	3.75	6.66	5.62	10.01	2.04
393	1	77	3	1	0	3.25	146	11.82	25.33	10.8
394	1	75	3	2	0	3.32	51.2	19.04	433	6.01
395	1	60	2	2	0	3.9	9.49	23.78	98.88	3.17
396	0	68	2	0	0	5.14	13.58	13.92	15.32	6.15
397	0	65	2	0	0	5.64	15.67	10.89	21.36	6.79
398	0	58	2	0	0	2.55	6.92	11.9	12.54	1.74
399	1	43	2	0	0	2.05	58.72	16.34	22.83	9.68
400	1	53	1	1	1	1.67	33.36	11.18	11.47	11.64
401	0	67	1	0	1	1.55	57.83	19.76	8.56	13.18
402	0	70	2	0	0	1.58	15.27	11.98	10.03	4.22
403	1	59	3	1	0	3.16	16.93	16.32	39.68	3.77
404	1	61	1	0	0	2.2	11.47	10.94	22.85	2.08
405	0	76	2	0	1	1.22	34.66	5.83	47.95	409
406	0	73	2	1	1	5.01	18.22	11.69	29.8	24.61
407	1	65	3	1	0	2.43	25.19	17.16	16.47	4.19
408	1	41	3	1	0	128.4	38.74	18.42	210.7	28.41
409	0	61	2	1	0	4.37	6.68	5.5	17.66	11.52
410	1	71	1	0	0	4.15	16.56	11.76	72.18	49.45
411	1	62	2	1	0	2.78	5.08	5.92	19.6	18.75
412	0	77	1	0	0	3.76	2.82	12.89	8.36	1.64
413	0	61	3	0	0	3.64	11.88	13.06	12.79	6.52
414	1	66	3	2	0	1.98	11.26	7.94	19.2	0.9
415	0	42	1	1	0	2.77	9.46	9.55	12.18	3.49
416	0	64	2	1	0	1.44	17.4	11.27	22.66	3.78
417	0	53	2	0	0	2.61	11.62	10.25	107.7	15.63
418	0	68	2	1	0	1.65	8.05	14.03	12.48	2.09
419	0	72	2	0	0	1.57	13.92	7.06	8.3	2.25
420	1	65	2	0	0	1.07	8.68	6.63	6.68	1.06
421	1	68	3	1	0	1.81	32.01	19.71	70.39	18.13
422	0	69	2	1	0	3.84	19.6	9.55	18.86	5.34
423	0	57	2	0	0	4.18	5.54	8.12	15.88	3.69
424	0	73	2	1	0	9.15	9.75	8.71	9.39	2.07
425	0	75	2	1	0	1.94	11.38	13.09	21.87	9.15
426	0	66	1	0	0	2.57	17.44	9.44	26.81	10.87
427	0	56	1	0	0	3.57	15.09	6.88	10.83	3.39
428	0	48	3	2	0	1.57	32.44	11.05	86.32	3.32
429	0	61	1	0	0	4.5	13.19	7.51	16.5	4.14
430	1	55	2	0	0	2.34	20.32	16.23	24.68	8.37
431	0	52	2	1	0	2.87	5.3	4.61	13.28	7.05
432	0	69	2	0	0	2.74	20.7	26.93	21.5	15.05
433	0	75	1	0	0	6.74	22.73	10.8	18.1	5.31
434	0	63	1	1	0	2.66	11.05	10.08	4.96	1.83
435	0	58	2	0	0	1.38	12	8.69	17.14	2.1
436	0	70	2	0	0	4.33	7.54	14.62	0.6	4.15
437	1	67	2	0	0	1.73	10.21	6.01	19.73	19.66
438	0	38	2	0	0	1.51	10.2	14.93	6.33	4.69
439	0	43	2	0	0	1.3	23.15	8.04	32.65	11.93
440	1	59	1	0	0	2.24	14.39	28.69	6.55	4.19
441	0	75	1	0	0	2.94	30.64	12.38	12.46	4.63
442	0	49	3	1	0	4.04	12.02	7.37	9.35	3.42
443	0	69	2	1	0	3.61	16.4	23.45	10.06	7.51
444	0	62	1	0	0	4.04	20.54	12.8	6.52	2.56
445	1	67	1	0	0	2.58	35.21	10.72	23.26	2.87
446	1	44	3	1	0	2.6	35	11.88	27.7	2.98
447	1	47	2	2	0	2.35	56.7	8.42	11.12	2.4
448	1	59	3	1	0	2.36	11.41	13.72	94.73	16.19
449	0	59	1	0	0	2.66	19.65	16.14	22.03	4.23
450	0	45	2	1	0	3.7	4.72	12.72	22.48	7.04
451	1	67	2	0	0	1.95	16.96	10.75	0.6	3.79
452	0	68	2	0	0	4.71	32.31	10.75	17.64	4.57
453	1	38	3	0	0	2.79	14.63	15.88	0.6	42.71
454	1	45	1	0	0	2.1	9.43	9.24	5.97	1.03
455	1	66	3	1	1	1.24	18.88	11.58	10.13	2.01
456	0	50	2	0	0	2.85	7.91	5.12	0.6	2.29
457	1	60	3	0	0	2.47	22.7	13.61	0.6	10.8
458	0	52	2	0	0	1.04	12.38	15.67	9.6	1.75
459	1	83	2	0	0	2.8	17.43	8.4	36.86	12.49
460	1	65	2	1	0	1.14	23.65	12.86	44.06	5.24
461	0	45	2	0	0	2.81	5	16.1	49.78	5.42
462	0	69	2	1	1	3.66	15.55	11.68	0.6	31.31
463	0	59	2	2	0	1.39	25.21	7.78	73.17	18.33
464	0	71	1	0	0	3.22	13.37	13.23	12.78	3.09
465	0	70	2	1	0	2.33	17.34	16.52	12.28	3.91
466	1	69	2	0	0	2.01	11.26	14.54	19.22	1.45
467	1	68	1	0	0	2.64	17.84	9.06	7.61	1.14
468	0	59	2	0	0	3.01	27.11	7.99	34.54	17.84
469	1	59	3	0	0	3.26	23.72	10.47	14.87	5.81
470	0	79	2	0	0	2.18	10.51	6.99	17.07	20.98
471	1	53	2	1	0	2.14	129.8	9.64	71.34	1.53
472	1	61	2	0	0	1.37	7.2	23.83	12.72	8.13
473	1	80	2	0	0	3.65	17.7	23.45	0.6	3.64
474	1	66	1	1	0	1.22	12.31	28.63	12.27	0.83
475	0	65	2	0	0	10.39	5.68	6.82	18.05	4.76
476	0	76	2	1	0	3.01	12.43	13.41	20.37	9.3
477	0	83	1	0	0	4.88	5.84	11.16	37.58	7.43
478	1	49	3	1	0	2.11	5.11	8.89	59.57	22.84
479	1	58	2	2	0	2.27	11.2	5.66	3.53	36.15
480	0	49	1	0	0	4.59	5.22	17.61	1.06	2.4
481	0	70	1	0	0	3.88	11.44	10.18	2.49	4.1
482	1	58	1	2	0	2.28	17.64	7.6	5.43	3.13
483	1	65	2	0	0	1.54	6.79	16.43	5.8	1.23
484	0	62	2	1	0	3.11	24.11	15.32	9.87	3.34
485	1	44	3	1	0	7.17	11.77	7.33	18.13	2.1
486	0	68	3	1	0	3.55	9.29	5.4	16.25	7.62
487	0	59	2	1	1	2.36	18.08	8.62	14.21	2.39
488	0	50	2	0	0	3.06	15.9	10.17	33.13	2.2
489	0	47	1	1	1	3.35	42.3	9.79	71.42	19.08
490	0	73	1	0	0	2.48	10.12	14.73	51.51	4.34
491	0	61	1	0	0	4.76	8.2	10.6	5.84	1.61
492	0	58	3	0	0	1.64	69	16.58	17.08	6.01
493	0	60	1	1	0	2.79	8.93	5.28	6.29	2.5
494	0	66	1	0	0	2.87	11.86	7.85	10.55	5.91
495	1	57	2	1	0	6.28	12.04	12.45	63.51	97.77
496	0	35	3	0	0	1.76	9.57	8.23	25.33	34.43
497	1	58	3	1	0	2.06	23.88	15.72	3.1	2.75
498	0	39	3	1	1	2.78	20.58	21.67	336.6	8.55
499	0	61	1	0	0	1.65	15.28	27.6	74.4	3.12
500	0	70	2	2	0	2.28	4.2	6.18	8.79	0.94
501	0	45	2	0	0	2.58	9.19	7.79	10.36	1.31
502	1	71	2	0	1	4.76	5.8	9.73	24.39	34.94
503	1	51	1	0	0	2.81	39.47	16.73	121.2	21.69
504	0	81	2	0	0	1.39	63.15	15.02	0.67	1.77
505	1	76	2	1	0	3.71	16.45	12.18	54.89	4.86
506	1	70	1	0	0	1.74	12.63	6.74	11.1	7.52
507	1	43	2	1	0	2.3	11.8	9.78	122	4.76
508	0	74	2	0	0	1.75	8.71	16.89	18.79	13.53
509	1	54	2	0	0	1.12	11.26	8.37	8.94	2.38
510	1	64	2	1	0	1.99	9.99	23.53	15.54	3.5
511	1	68	2	0	0	2.91	13.76	10.02	74.75	7.43
512	1	53	2	1	0	2.02	26.39	25.59	12.2	62.76
513	1	65	2	0	0	1.9	11.12	9.01	33.35	67.91
514	0	54	2	0	0	2.5	11.97	20.65	9.81	6.17
515	1	63	3	0	0	2.15	24.34	9.6	24.68	3.07
516	0	60	2	0	0	3.31	10.64	11.42	34.13	28.95
517	1	67	2	0	1	1.57	167.9	12.96	11.88	0.97
518	1	69	2	1	1	5.52	63.65	35.22	117.5	3.02
519	0	73	1	0	0	2.34	15.26	31.87	8.88	2.44
520	0	46	1	0	0	2.69	8.68	9.2	16.77	4.59
521	0	35	2	0	0	2.74	16.99	8.27	1.03	2.07
522	1	24	2	0	0	2.29	35.15	43.65	13.28	0.69
523	0	44	2	2	0	2.62	4.15	22.2	28.6	1.15
524	0	44	2	0	0	1.41	14.17	13.19	57.47	3.19
525	0	67	2	0	0	4.05	70.35	12.52	63.48	9.61
526	0	62	2	1	1	3.59	14.67	19.28	12.74	4.51
527	0	70	2	1	0	2.6	12.56	10.41	33.84	32.18
528	1	69	3	0	0	3.95	156.5	17.96	34.21	17.9
529	1	45	1	1	0	3.52	35.03	4.67	285.8	11.06
530	1	48	1	0	0	3.2	8.97	14.43	4.65	3.48
531	0	83	3	0	1	1.68	134.3	11.04	53.02	14.06
532	0	49	2	0	0	3.15	13.52	8.24	12.82	2.2
533	0	80	2	1	1	112.9	18.63	9.46	33.81	77.45
534	0	68	2	0	1	19.73	12.54	9.55	35.36	29.31
535	1	53	1	0	0	3.12	7.7	27.49	13.59	5.27
536	0	52	3	0	0	1.77	17.61	5.94	35.74	12.7
537	0	64	3	0	0	2.77	35.67	13.28	39.23	2
538	1	46	3	1	1	2.33	75.85	10.27	66.91	19.88
539	0	40	2	0	0	3.05	3.97	12.36	4.25	4.19
540	0	31	2	0	0	2.18	22.44	8.63	7.69	2.51
541	0	40	3	0	1	3.6	16.88	23.86	14.46	4.33
542	1	69	2	0	0	2.25	18.36	7.5	6.58	5.33
543	0	49	1	0	0	5.12	10.99	7.64	10.32	3.93
544	0	47	1	0	0	3.23	13.62	10.49	11.65	2.36
545	1	63	1	0	0	1.78	13.84	9.91	5.92	0.91
546	0	61	1	0	0	6.28	18.1	5.31	11.28	1.99
547	1	66	2	0	0	5.05	11.35	9.12	12.81	2.04
548	0	47	2	1	0	4.71	19.83	6.95	19.17	9.15
549	1	66	1	0	0	0.97	16.79	11	25.53	1.32
550	0	73	1	0	0	2.06	9.09	4.57	69.68	6.57
551	0	61	1	0	0	3.98	11.56	15.9	12.46	3.8
552	1	53	2	0	0	2.38	13	5.75	25.77	2.1
553	0	54	1	0	0	2.63	9.67	10.72	9.88	5.28
554	1	65	1	0	0	2.69	2.91	13.65	11.79	1.37
555	0	56	1	0	0	3.1	4.27	3.84	9.47	1.77
556	0	73	3	0	0	2.37	9.6	24.77	1.39	9.79
557	0	67	3	0	1	5.49	21.11	8.85	1000	9.95
558	1	32	2	0	0	3.33	17.37	6.53	8.54	0.97
559	1	60	2	0	0	2.2	15.45	6.61	17.5	14.97
560	0	74	1	0	0	4.11	11.63	15.38	29.45	28.49
561	0	75	1	0	0	1.8	40.23	11.26	17.85	11.3
562	1	71	2	0	0	6.92	16	5.76	59.47	53.86
563	1	59	1	0	0	4.74	9.69	6.99	11.92	2.23
564	1	46	1	2	0	1.85	30.09	15.23	16.28	0.63
565	0	78	2	1	0	1.91	12.39	9	157.9	20.93
566	1	44	2	1	0	1.74	6.29	9.71	16.14	2.07
567	0	72	2	0	0	2.66	7.55	6.65	2.09	1.56
568	0	63	3	0	0	5.5	5.5	5.08	10.48	1.73
569	1	50	1	0	0	13.95	10.12	16.58	23.26	1.42
570	0	71	2	0	0	4.61	10.46	7.94	9.21	21.18
571	1	55	3	2	0	2.46	17.83	17.45	31.58	1.09
572	0	66	2	0	0	2.59	55.4	9.39	0.6	5.45
573	0	65	1	0	0	3.06	9.58	19.31	8.28	1.51
574	0	77	1	0	0	1.4	9.07	5.92	3.23	1.66
575	0	72	1	0	0	2.85	18.14	11.71	15.12	5.33
576	0	71	2	1	0	1.71	117.4	17.25	21.76	1.7
577	0	75	3	0	0	3.72	18.3	8.33	14.03	5.61
578	1	52	1	0	0	3.47	10.42	12.87	3.31	1.31
579	1	47	1	2	0	0.94	13.1	18.54	9.26	1.83
580	0	67	2	1	1	6.02	42	29.96	134.4	18.29
581	0	60	3	2	0	3.91	26.04	8.83	24.46	3.4
582	0	46	1	0	0	2.64	11.5	6.2	6.08	2.87
583	1	60	3	0	0	2.86	41.84	27.36	0.6	2.29
584	0	65	1	0	0	2.45	8.43	21.16	19.69	2.61
585	1	74	2	0	0	4.03	12.22	6.85	9.06	6.34
586	1	52	2	1	1	2.54	7.73	16.44	13.03	2.2
587	0	54	1	0	0	4.52	7.67	8.82	30.08	2.6
588	1	44	3	2	0	3.84	46.63	15.52	62.05	23.65
589	0	74	2	1	0	3.44	12.88	8.53	33.57	3.28
590	0	53	1	0	0	3.03	12.1	8.04	11.64	2.33
591	0	51	1	0	0	3.56	13.9	9.08	5.53	2.14
592	0	71	2	2	1	3.26	9.58	7.29	4.79	1.19
593	1	78	3	1	0	2.6	8.62	6.16	10.9	10.82
594	1	71	3	0	0	2.54	13.71	11.57	0.6	3.5
595	1	63	1	0	0	1.34	7.36	7.47	7.72	1.06
596	0	67	3	0	0	2.48	55	16.08	24.69	2.52
597	1	54	2	0	0	1.51	14.97	18.51	23.36	2.03
598	0	67	3	1	0	2.29	729.8	12.55	1000	53.32
599	0	73	2	0	0	2.46	10.93	10.41	39.69	1.4
600	1	39	3	1	0	1.5	19.06	17.6	2.31	0.25
601	0	56	2	0	0	2.82	38.37	9.75	4.37	2.07
602	0	69	1	0	0	1.98	7.56	4.71	10.44	2.15
603	0	68	2	1	0	1.66	7.87	7.42	26.4	12.07
604	1	61	1	1	0	2.03	11.69	8.48	20.03	5.97
605	0	60	1	0	0	4.22	9.26	8.78	10.91	6.95
606	1	54	1	0	0	4.91	12.17	4.25	16.13	1.2
607	0	69	2	2	0	2.43	19.48	10.78	23.7	6.77
608	1	77	3	0	0	1.62	5.89	10.26	48.78	9.75
609	0	61	3	0	0	5.72	16.62	14.14	8.44	1.46
610	1	60	2	0	0	4.74	8.6	21.26	22.78	2.73
611	0	29	2	1	0	2.95	17.67	8.52	10.26	7.17
612	1	39	2	2	0	4.77	37.55	31.32	19.64	7.96
613	1	44	2	1	0	4.07	24.71	36.59	19.3	22.15
614	1	71	2	0	0	1.38	11.45	13.02	2.05	4.98
615	0	76	3	1	1	1.55	18.64	17.89	91.61	39.08
616	1	56	2	1	0	2.48	4.92	9.62	13.83	1.57
617	1	63	2	0	0	3.11	14.16	7.24	20.86	3.35
618	1	66	2	0	0	1.49	8.47	4.55	11.54	2.25
619	0	55	3	0	0	1.23	11.94	4.76	11.13	2.33
620	0	49	2	0	0	1.65	4.21	10.93	6.67	1.7
621	0	75	2	1	0	4.11	16.92	10.58	32.22	6.82
622	1	50	2	1	0	2.31	8.65	31.19	13.58	4.44
623	1	70	2	1	0	3.35	16.38	9.78	35.05	4.7
624	1	51	3	0	0	3.34	18.53	22.31	6.2	1.66
625	0	47	2	1	0	2.77	13.3	5.96	4.81	3.4
626	0	30	2	1	0	1.64	30.59	14.77	6.56	5.69
627	0	69	2	2	0	2.29	19.06	6.99	30.16	6.28
628	0	54	2	0	0	2.45	8.88	10.46	12.25	4.86
629	1	50	2	0	0	4.93	32.55	4.22	13.93	2.77
630	0	67	2	0	0	4.81	13.38	15.6	8.16	4.52
631	0	64	1	0	0	4.28	5.89	28.53	10.43	2.82
632	1	61	2	2	0	4.99	21	26.57	1.17	17.15
633	1	54	2	1	0	2.5	11.35	6.3	18.73	5.42
634	1	47	2	1	0	1.29	23.39	9.68	18.24	28.56
635	0	45	2	0	0	4.41	11.9	5.76	6.15	1.61
636	0	52	2	0	0	1.51	10.85	7.23	4.23	2.97
637	0	45	2	2	0	1.66	9.92	8.97	1.92	2.23
638	0	46	1	0	0	3.95	12.14	6.24	78.48	23.94
639	0	52	2	1	1	3.55	281.7	58.19	1000	187.3
640	1	71	2	0	0	3.83	31.05	8	12.02	4.54
641	0	49	1	0	0	2.69	12.75	6.24	21.69	4.13
642	0	63	1	0	0	3.07	19.03	40.57	10.37	3.18
643	1	70	2	1	0	1.96	11.63	12.4	6.49	3.39
644	0	58	2	0	0	6.63	26.14	18.13	12.74	10.02
645	1	69	2	1	0	1.68	77.59	9.28	35.12	32.65
646	0	62	3	0	0	2.74	34.42	15.76	7.01	1.07
647	1	63	3	0	0	1.44	8.3	6.43	23.53	1.37
648	0	67	2	0	0	3.5	10.67	8.18	6.48	1.87
649	1	67	2	1	0	1.27	10.37	12.1	25.27	4.89
650	0	64	3	1	1	4.54	4.09	5.66	7.41	2.12
651	0	69	2	1	0	4.23	21.14	13.69	2.81	22.35
652	1	69	1	2	1	2.94	11.58	7.99	63.73	14.87
653	0	55	2	0	0	1.89	7.27	20.44	26.58	5.16
654	0	72	2	0	0	2.73	3.13	8.67	13.39	4.13
655	0	63	3	2	0	1.44	9.11	11.12	24.56	18.08
656	0	56	2	0	0	2.98	15.39	18.31	17.06	10.13
657	0	65	2	0	0	4.13	11.23	9.67	8.26	4.98
658	0	45	2	2	1	3.67	15.47	28.3	73.62	5.55
659	0	55	2	0	1	4.95	19.39	18.35	36.07	14.37
660	1	64	2	2	0	3.08	20.05	18.6	183.2	7.2
661	1	61	2	0	0	3.03	10.92	32.7	10.81	2.93
662	1	64	1	0	0	1.2	15.81	12.96	16.16	2.86
663	1	65	1	1	0	11.85	13.25	8.17	2.87	2.02
664	1	60	2	2	0	2.8	8.85	14.62	30.31	4.32
665	1	69	2	0	0	3.17	13.68	10.82	57.53	5.81
666	1	65	1	0	0	4.92	12.09	10.46	18.92	2.05
667	0	88	2	1	0	2.89	7.4	16.04	4.48	5.61
668	0	61	2	0	0	11.05	17.49	10.5	27.45	5.55
669	0	76	3	0	0	2.78	8.07	5.45	5.81	1.44
670	0	67	3	0	0	1.91	31.02	14.9	3.59	4.66
671	1	47	3	2	0	2.35	34.58	10.71	0.6	6.25
672	1	49	3	2	0	2.63	6.41	15.1	133.7	3.75
673	1	68	3	1	0	3.55	14.39	14.35	63.96	17.97
674	0	42	2	0	0	2.8	10.94	10.34	3.01	1.44
