# Supplementary material for: A model of multiple tumor marker for lymph node metastasis assessment in colorectal cancer: a retrospective study
Source: PeerJ. 2022 Apr 11;10:e13196. doi: 10.7717/peerj.13196 (PMC9009328; doi:10.7717/peerj.13196)
Supplement: Supplemental Information 4 [file peerj-10-13196-s004.xlsx]

## Sheet: Sheet1
Patients_ID	Sex	Age	T	N	M	AFP	CEA	CA153	CA199	CA125
1	1	75	2	0	0	1.96	3.78	21.98	16.05	15.89
2	1	79	3	1	0	1.79	10.94	14.1	16.25	11.01
3	1	62	4	0	0	2.68	28.35	12.32	78.4	8.58
4	2	41	3	1	0	0.79	3.96	6.94	4.49	7.45
5	2	86	2	1	0	4.03	7.06	8.14	11.02	8.93
6	1	72	2	0	0	4.84	2.95	29.99	24.34	16.77
7	1	43	4	2	0	5.03	3.23	6.4	37.53	25.39
8	2	64	4	1	0	3.17	1.07	17.15	0.6	32.62
9	2	63	3	0	0	3.17	1.07	17.15	0.6	32.62
10	1	50	3	1	0	6.44	2.17	11.12	27.94	14.64
11	2	57	1	0	0	4.06	3.18	12.59	55.89	17.75
12	1	72	2	0	0	5.74	4.25	18.74	13.79	20.38
13	1	78	3	0	0	2.9	3.28	21.35	0.6	14.77
14	1	76	3	0	0	1.22	3.88	16.06	4.58	15.05
15	1	73	4	0	0	2.6	1.07	14.52	7.25	15.88
16	1	76	4	0	0	2.96	4.99	23.04	10.62	15.1
17	2	84	4	2	0	3.39	1.71	8.3	21.28	12.48
18	2	78	3	0	0	1.72	36.11	9.47	3.04	10.13
19	1	82	3	0	0	3.68	5.07	12.14	27	13.88
20	1	64	3	1	0	2.8	6.36	11.69	8.47	9.26
21	1	72	4	1	0	1.15	9.05	20.74	18.38	32.93
22	2	88	3	2	0	1.85	7.33	18.36	11.18	30.44
23	1	57	2	0	0	4.78	0.72	11.23	13.96	5.96
24	1	40	4	2	1	4.56	6.22	14.18	3.91	9.35
25	1	81	2	0	0	3.69	2.04	13.52	10.23	14.44
26	2	79	3	0	0	2.66	5.57	9.6	18.23	29.33
27	2	53	3	0	0	2.15	1.75	4.71	5.98	6.43
28	2	75	3	2	0	2.25	13.11	9.92	64.95	12.29
29	1	78	3	0	0	1.63	3.27	7.08	31.94	9.05
30	1	43	3	0	0	2.49	1.55	16.13	6.72	6.45
31	2	79	3	0	0	1.93	2.6	9.4	15.3	12.95
32	1	61	2	0	0	1.85	1.1	9.02	8.82	10.49
33	1	66	4	1	0	5.63	3.26	6.28	23.98	11.7
34	1	54	2	0	1	1.81	17.78	26.62	17.72	8.03
35	1	53	3	2	0	3.01	4.71	14.68	0.6	17.51
36	1	75	2	0	0	1.16	3.9	12.05	18.52	10.41
37	1	52	3	1	1	261.7	553	30.48	112.7	10.23
38	1	67	4	1	0	2.55	3.58	23.66	83.56	42.73
39	1	55	3	0	0	9.84	4.13	8.31	7.95	31.53
40	1	65	3	1	0	2.5	1.29	14.66	6.55	11.82
41	1	67	3	0	0	3.86	1.6	13.59	7.66	18.43
42	1	46	2	0	1	4.57	5.66	7.15	15.06	11.7
43	1	64	2	0	0	2.24	3.81	11.06	14.12	21.88
44	1	27	3	2	0	0.68	3.13	9.12	6.43	9.19
45	2	43	4	2	0	5.67	2.63	8.17	845.7	17.5
46	1	63	2	0	0	1.81	1.79	6.14	13.2	16.91
47	2	51	3	2	0	3.22	3.02	13.65	17.79	15.77
48	2	84	2	2	0	4.61	1.72	15.17	11.28	5.36
49	2	66	3	1	0	1.47	11.87	20.37	27.14	10.25
50	1	72	3	0	0	1.1	52.93	15.68	11.86	19.32
51	2	71	2	0	0	1.67	2.04	15.65	14.43	4.68
52	1	29	3	0	0	1.47	9.95	10.87	26.42	12.53
53	2	60	3	0	1	1.4	0.54	9.21	23.86	8.43
54	1	59	3	1	1	1.44	158	12.64	254.8	15.59
55	2	63	3	1	0	2.1	7.66	10.12	11.18	16.75
56	1	73	2	0	0	0.61	2.74	6.46	34.51	10.44
57	2	66	3	0	0	3.83	5.31	11.37	37.83	14.15
58	1	45	3	0	0	1.78	1.47	8.43	6.57	11.29
59	1	72	3	0	0	0.94	4.28	6.08	9.18	13.41
60	1	69	2	0	0	1.4	4.19	12.68	23.92	10.46
61	1	65	3	2	1	2.88	2.18	17.6	1000	295.2
62	2	83	1	0	0	2.58	4.02	18.73	49.22	22.09
63	1	63	2	0	0	2.09	4.42	14.06	14.24	6.92
64	1	63	3	0	0	1.94	4.43	22.44	4.86	13.76
65	1	61	4	0	0	1.74	9.1	24.82	14.07	8.63
66	2	43	3	0	0	0.98	1.26	9.21	43.78	25.3
67	1	63	3	0	0	7.12	1.81	11.32	18.69	10.61
68	1	62	3	1	0	7.27	8.23	14.65	8.18	12.31
69	2	57	2	0	0	2.97	2.4	14.74	2.16	13.65
70	2	48	2	1	0	1.05	2.8	14.17	2.4	11.15
71	2	71	4	1	0	1.17	7.78	15.54	16.67	9.63
72	1	80	3	0	0	3.44	3.04	12.18	8.22	22.62
73	2	60	2	0	0	0.64	1.28	8.41	9.03	11.09
74	1	76	4	2	1	7.22	135.6	10.29	317.4	16.25
75	1	62	3	1	0	2	2.58	5.46	6.77	10.26
76	1	48	3	1	0	3.67	4.41	11.99	7.99	15.56
77	1	55	3	0	0	1.44	103.3	4.55	1.91	7.02
78	2	50	1	0	0	1.99	1.47	11.42	6.23	17.22
79	1	76	3	0	0	1.15	3.37	9.81	17.29	7.13
80	1	73	3	0	0	1.28	2.43	21.11	10.86	6.53
81	1	60	3	0	0	1.7	10.15	18.53	44.27	6.89
82	1	52	4	2	0	2.08	5.51	11.61	12.76	16.92
83	1	58	2	1	0	4.05	2.12	21.5	8.91	7.7
84	2	61	4	1	1	1.95	38.27	7.08	25.31	7.83
85	2	41	2	0	0	2.72	4.73	7.58	18.86	9.96
86	1	62	3	0	0	2.54	1.42	10.51	12.86	6.33
87	2	70	3	1	1	2.58	32.41	19.61	26.67	14.47
88	1	91	2	0	0	3.37	1.78	16.09	11.78	9.57
89	1	87	3	0	0	0.65	2.55	9.54	15.62	6.08
90	1	63	3	0	0	3.67	1.77	3.69	18.23	6.65
91	1	88	3	0	0	3.48	2.73	7.64	20.89	12.23
92	1	78	3	2	1	208.5	8.32	178.7	20.32	9.15
93	1	51	3	1	0	2.14	9.52	14.85	9.75	13.21
94	1	64	3	0	0	2.71	5.95	19.58	13.77	14.85
95	1	75	3	0	0	1.71	4.01	8.6	14.36	22.77
96	1	66	3	2	1	4.89	36.03	17.66	97.54	34.43
97	2	66	2	0	0	2.67	3.23	14.6	23.89	21.56
98	1	68	3	2	0	2.76	18.78	21.32	20.13	9.9
99	1	74	3	1	0	2.98	2.97	11.31	20.16	5.34
100	2	52	2	1	0	2.5	3.41	26.69	5.82	17.31
101	1	62	3	1	0	5.03	7.96	5.14	8.25	7.94
102	1	37	3	2	0	3.11	8.96	9.22	7.94	11.34
103	1	57	2	0	0	4.66	1.73	18.97	12.77	10.27
104	1	59	3	1	0	3.03	3.86	10.65	25.48	10.48
105	1	51	4	0	0	6.57	4.23	22.65	12.3	10.23
106	1	67	3	0	0	1.3	3.63	11.21	25.06	9.21
107	1	74	3	1	0	1.88	11.14	12.3	10.08	11.62
108	1	81	2	0	0	2.46	10.88	5.83	1.42	10.09
109	2	66	4	1	0	3.46	18.92	5.21	60.45	11.59
110	1	73	3	0	0	2.84	5.38	6.24	12.9	18.72
111	1	28	4	2	0	1210	1.48	26.87	5.29	19.87
112	2	47	3	1	0	1.08	1.93	29.14	3.71	11.18
113	1	75	3	0	0	3.25	10.78	16.42	17.27	17.75
114	1	46	3	1	0	1.82	1.52	12.16	16.73	18.82
115	2	68	2	1	0	4.17	1.92	8.44	11.44	19.61
116	1	83	3	1	0	0.9	2.98	14.03	10.95	18.31
117	1	72	3	0	0	1.17	3.43	6.03	0.6	26.75
118	1	54	3	0	0	3.68	0.53	22.76	3.8	4.88
119	1	81	3	0	0	1.7	9.55	17.47	42.12	12.51
120	1	66	3	0	1	5.29	29.34	8.2	18.69	5.85
121	2	68	3	1	1	3.63	77.64	15.7	9.63	12.63
122	1	56	4	0	0	2.26	9.92	19.7	48.04	10.78
123	2	73	3	2	0	6.79	4.52	11.69	16.73	31.8
124	1	60	3	0	0	5.92	3.47	11.26	166.3	81.39
125	2	70	2	1	0	4.14	5.38	12.97	34.62	9.3
126	2	51	4	1	0	2.66	2.45	12.32	15.07	11.57
127	2	69	3	2	0	1.46	17.85	29.61	11.77	9.45
128	2	87	4	1	0	1.44	5.28	11.63	128.3	21.55
129	2	68	2	0	0	1.38	2.74	18.86	20.73	38.56
130	1	83	4	0	0	5.26	4.32	8.93	102.5	43.34
131	2	41	4	1	0	1.43	1.97	20.18	85.24	7.73
132	1	42	3	1	0	3.03	1.39	4.83	11.07	9.83
133	1	53	3	0	0	2.05	5.11	7.79	0.6	12.68
134	1	46	3	0	0	2.57	3.27	29.71	16.58	13.19
135	1	47	3	0	1	3.37	0.96	6.76	3.18	8.11
136	1	51	3	1	0	1.81	2.88	14.65	66.57	16.25
137	1	51	2	0	0	4.22	2.59	9.28	18.62	11.57
138	1	61	4	1	0	1.84	2.29	8.78	9.67	11.64
139	1	30	3	0	0	1.8	2.34	14.15	17.9	22.51
140	2	78	4	0	0	1.56	16.49	10.97	21.73	20.09
141	1	76	4	1	0	2.32	5.6	14.32	15.6	18.56
142	2	67	4	2	0	3.35	2.03	12.26	14.47	4.01
143	1	47	3	0	0	3.09	2.99	21.14	0.6	15.4
144	1	64	3	0	0	2.23	3.41	13.8	10.2	6.96
145	1	78	4	2	1	2.98	6.41	32.14	64.77	129.2
146	1	67	2	1	0	3.6	2.98	6.52	3.14	12.41
147	1	71	3	0	0	2.85	6.14	8.81	15.97	21.22
148	2	71	2	0	0	1.69	7.72	13.3	7.16	11.35
149	1	78	2	0	0	2.93	7.62	9.74	15.75	12.23
150	1	74	3	1	1	1.67	5.95	8.77	59.22	24.77
151	1	73	3	0	0	5.17	37.77	39.93	30.88	20.41
152	1	44	4	1	0	3.14	3.03	12.78	8.15	1.9
153	1	85	3	2	0	1.23	3.95	13.33	29.03	14.93
154	2	67	3	2	0	0.97	2.76	34.03	22.79	12.62
155	2	64	3	1	0	2.93	2.42	17.78	10.12	8.68
156	1	58	3	1	0	2.73	5.09	21.2	11.58	7.41
157	1	70	4	1	1	4.68	7.97	19	40.14	55.83
158	1	78	4	2	0	3.77	3.64	23.97	43.8	69.64
159	2	79	1	0	0	0.63	2.37	14.57	13.07	9.85
160	1	52	4	0	0	2.95	1.36	5.95	7.66	11.64
161	2	49	4	0	1	1.72	18.09	10.35	139.1	13.28
162	2	48	4	1	0	1.43	6.44	5.25	46.92	27.59
163	1	71	3	0	1	5.25	86.79	24.18	46.76	10.76
164	1	61	3	0	0	0.78	2.24	9.85	18.17	13.68
165	2	45	3	0	0	1.37	1.09	8.82	7.13	19.95
166	2	78	4	2	0	0.99	384.5	22.64	51.67	13.29
167	1	64	3	0	0	1.63	2.63	4.62	12	5.09
168	1	79	3	0	0	0.74	8.41	13.37	15.67	16.75
169	2	76	3	0	1	2.72	723.5	11.34	2.47	18.89
170	2	46	4	2	0	5.56	25.28	5.48	173.7	29.43
171	1	52	2	0	0	1.8	1.94	8.04	19.44	8.64
172	2	57	4	2	0	1.14	4.61	9.26	7	28.87
173	1	67	3	0	0	6.33	1.1	14.99	8.23	33.77
174	2	51	2	0	0	9.19	0.41	6.98	7.88	12.01
175	1	62	3	1	1	4.13	4.38	8.95	43.77	12.41
176	2	47	4	1	1	4.31	7.17	23.8	5.29	14.78
177	1	53	1	0	0	3.75	2.24	8.83	32.39	7.43
178	2	69	4	1	0	2.4	34.6	13.34	635.1	34.73
